# Supplementary material
Source: MDPI journal article supplement (https://www.mdpi.com/2076-3417/10/18/6295)
Supplement: s1 [file s1]

# Software Usability Measurement Inventory

## SUMI

Dear participant,

Thank you for participating in this study. Our aim is to evaluate the usability of Computer-Assisted Translation (CAT) tools from the translators' perspective. For more information please contact me at [hialotaibi@ksu.edu.sa](mailto:hialotaibi@ksu.edu.sa).

Please note that the information you provide is kept completely confidential and no information is stored on computer media that could identify you as a person.

This questionnaire has 50 statements. Please answer them all. After each statement there are three boxes.

- Check the first box if you generally AGREE with the statement.
- Check the middle box if you are UNDECIDED, or if the statement has no relevance to your software or to your situation.
- Check the right box if you generally DISAGREE with the statement.

In checking the left or right box you are not necessarily indicating strong agreement or disagreement but just your general feeling most of the time.

There are some introductory questions and also some general questions at the end.

**Password:**

**Gender:**

- Male  
 Female

**Age:**

- below 20 years  
 20-25 years  
 26-30 years  
 31-40 years  
 above 40 years

**I am:**

- A full-time translator  
 A part-time translator (freelancer)  
 A translation student

**What is your translation experience (including college years):**

- less than a year  
 1-5 years  
 6-10 years  
 more than 10 years

**For my translation tasks, I usually use:**

- SDL Trados
- MemoQ
- Memsource
- Wordfast
- MateCat
- Transifex

Other:

*Statements 1 - 10 of 50.*

|                                                                             | <b>Agree</b>          | <b>Undecided</b>      | <b>Disagree</b>       |
|-----------------------------------------------------------------------------|-----------------------|-----------------------|-----------------------|
| This software responds too slowly to inputs.                                | <input type="radio"/> | <input type="radio"/> | <input type="radio"/> |
| I would recommend this software to my colleagues.                           | <input type="radio"/> | <input type="radio"/> | <input type="radio"/> |
| The instructions and prompts are helpful.                                   | <input type="radio"/> | <input type="radio"/> | <input type="radio"/> |
| This software has at some time stopped unexpectedly.                        | <input type="radio"/> | <input type="radio"/> | <input type="radio"/> |
| Learning to operate this software initially is full of problems.            | <input type="radio"/> | <input type="radio"/> | <input type="radio"/> |
| I sometimes don't know what to do next with this software.                  | <input type="radio"/> | <input type="radio"/> | <input type="radio"/> |
| I enjoy the time I spend using this software.                               | <input type="radio"/> | <input type="radio"/> | <input type="radio"/> |
| I find that the help information given by this software is not very useful. | <input type="radio"/> | <input type="radio"/> | <input type="radio"/> |
| If this software stops it is not easy to restart it.                        | <input type="radio"/> | <input type="radio"/> | <input type="radio"/> |
| It takes too long to learn the software functions.                          | <input type="radio"/> | <input type="radio"/> | <input type="radio"/> |

*Statements 11 - 20 of 50.*

|                                                                            | <b>Agree</b>          | <b>Undecided</b>      | <b>Disagree</b>       |
|----------------------------------------------------------------------------|-----------------------|-----------------------|-----------------------|
| I sometimes wonder if I am using the right function.                       | <input type="radio"/> | <input type="radio"/> | <input type="radio"/> |
| Working with this software is satisfying.                                  | <input type="radio"/> | <input type="radio"/> | <input type="radio"/> |
| The way that system information is presented is clear and understandable.  | <input type="radio"/> | <input type="radio"/> | <input type="radio"/> |
| I feel safer if I use only a few familiar functions.                       | <input type="radio"/> | <input type="radio"/> | <input type="radio"/> |
| The software documentation is very informative.                            | <input type="radio"/> | <input type="radio"/> | <input type="radio"/> |
| This software seems to disrupt the way I normally like to arrange my work. | <input type="radio"/> | <input type="radio"/> | <input type="radio"/> |
| Working with this software is mentally stimulating.                        | <input type="radio"/> | <input type="radio"/> | <input type="radio"/> |
| There is never enough information on the screen when it's needed.          | <input type="radio"/> | <input type="radio"/> | <input type="radio"/> |
| I feel in command of this software when I am using it.                     | <input type="radio"/> | <input type="radio"/> | <input type="radio"/> |
| I prefer to stick to the functions that I know best.                       | <input type="radio"/> | <input type="radio"/> | <input type="radio"/> |

*Statements 21 - 30 of 50.*

|                                                                             | <b>Agree</b>          | <b>Undecided</b>      | <b>Disagree</b>       |
|-----------------------------------------------------------------------------|-----------------------|-----------------------|-----------------------|
| I think this software is inconsistent.                                      | <input type="radio"/> | <input type="radio"/> | <input type="radio"/> |
| I would not like to use this software every day.                            | <input type="radio"/> | <input type="radio"/> | <input type="radio"/> |
| I can understand and act on the information provided by this software.      | <input type="radio"/> | <input type="radio"/> | <input type="radio"/> |
| This software is awkward when I want to do something which is not standard. | <input type="radio"/> | <input type="radio"/> | <input type="radio"/> |
| There is too much to read before you can use the software.                  | <input type="radio"/> | <input type="radio"/> | <input type="radio"/> |
| Tasks can be performed in a straight forward manner using this software.    | <input type="radio"/> | <input type="radio"/> | <input type="radio"/> |
| Using this software is frustrating.                                         | <input type="radio"/> | <input type="radio"/> | <input type="radio"/> |
| The software has helped me overcome any problems I have had in using it.    | <input type="radio"/> | <input type="radio"/> | <input type="radio"/> |
| The speed of this software is fast enough.                                  | <input type="radio"/> | <input type="radio"/> | <input type="radio"/> |
| I keep having to go back to look at the guides.                             | <input type="radio"/> | <input type="radio"/> | <input type="radio"/> |

*Statements 31 - 40 of 50.*

|                                                                            | <b>Agree</b>          | <b>Undecided</b>      | <b>Disagree</b>       |
|----------------------------------------------------------------------------|-----------------------|-----------------------|-----------------------|
| It is obvious that user needs have been fully taken into consideration.    | <input type="radio"/> | <input type="radio"/> | <input type="radio"/> |
| There have been times in using this software when I have felt quite tense. | <input type="radio"/> | <input type="radio"/> | <input type="radio"/> |
| The organisation of the menus seems quite logical.                         | <input type="radio"/> | <input type="radio"/> | <input type="radio"/> |
| The software allows the user to be economic of keystrokes.                 | <input type="radio"/> | <input type="radio"/> | <input type="radio"/> |
| Learning how to use new functions is difficult.                            | <input type="radio"/> | <input type="radio"/> | <input type="radio"/> |
| There are too many steps required to get something to work.                | <input type="radio"/> | <input type="radio"/> | <input type="radio"/> |
| I think this software has sometimes given me a headache.                   | <input type="radio"/> | <input type="radio"/> | <input type="radio"/> |
| Error messages are not adequate.                                           | <input type="radio"/> | <input type="radio"/> | <input type="radio"/> |
| It is easy to make the software do exactly what you want.                  | <input type="radio"/> | <input type="radio"/> | <input type="radio"/> |
| I will never learn to use all that is offered in this software.            | <input type="radio"/> | <input type="radio"/> | <input type="radio"/> |

*Statements 41 - 50 of 50.*

|                                                                                | <b>Agree</b>          | <b>Undecided</b>      | <b>Disagree</b>       |
|--------------------------------------------------------------------------------|-----------------------|-----------------------|-----------------------|
| The software hasn't always done what I was expecting.                          | <input type="radio"/> | <input type="radio"/> | <input type="radio"/> |
| The software presents itself in a very attractive way.                         | <input type="radio"/> | <input type="radio"/> | <input type="radio"/> |
| Either the amount or quality of the help information varies across the system. | <input type="radio"/> | <input type="radio"/> | <input type="radio"/> |
| It is relatively easy to move from one part of a task to another.              | <input type="radio"/> | <input type="radio"/> | <input type="radio"/> |
| It is easy to forget how to do things with this software.                      | <input type="radio"/> | <input type="radio"/> | <input type="radio"/> |
| This software occasionally behaves in a way which can't be understood.         | <input type="radio"/> | <input type="radio"/> | <input type="radio"/> |

- This software is really very awkward.
- It is easy to see at a glance what the options are at each stage.
- Getting data files in and out of the system is not easy.
- I have to look for assistance most times when I use this software.
- 

**How important for you is the kind of software you have just been rating?**

- Extremely important
- Important
- Not very important
- Not important at all

**How would you rate your software skills and knowledge?**

- Very experienced and technical
- I'm experienced but not technical
- I can cope with most software
- I find most software difficult to use

**What do you think is the best aspect of this software, and why?**

**What do you think needs most improvement, and why?**

***When you've answered all the questions:  
please click the 'Send' button.***

**Send**
